# Supplementary material for: En face image-based classification of diabetic macular edema using swept source optical coherence tomography
Source: PubMed Central journal article supplement (PMC8026626; doi:10.1038/s41598-021-87440-3), 2021-04-07

# **En Face Image-Based Classification of Diabetic Macular Edema Using Swept Source Optical Coherence Tomography**

Atsushi Fujiwara,<sup>1,2</sup> Yuki Kanzaki,<sup>1</sup> Shuhei Kimura,<sup>1</sup> Mio Hosokawa,<sup>1</sup> Yusuke Shiode,<sup>1</sup> Shinichiro Doi,<sup>1</sup> Kosuke Takahashi,<sup>1</sup> Ryo Matoba,<sup>1</sup> Yuki Morizane<sup>1,\*</sup>

## **Institutional Affiliation:**

<sup>1</sup> Department of Ophthalmology, Okayama University Graduate School of Medicine, Dentistry and Pharmaceutical Sciences, Okayama 700-8558, Japan

<sup>2</sup> Department of Orthoptics, Faculty of Rehabilitation, Kawasaki University of Medical Welfare, Okayama 701-0193, Japan

\*[moriza-y@okayama-u.ac.jp](mailto:moriza-y@okayama-u.ac.jp)

Suppl fig. 1

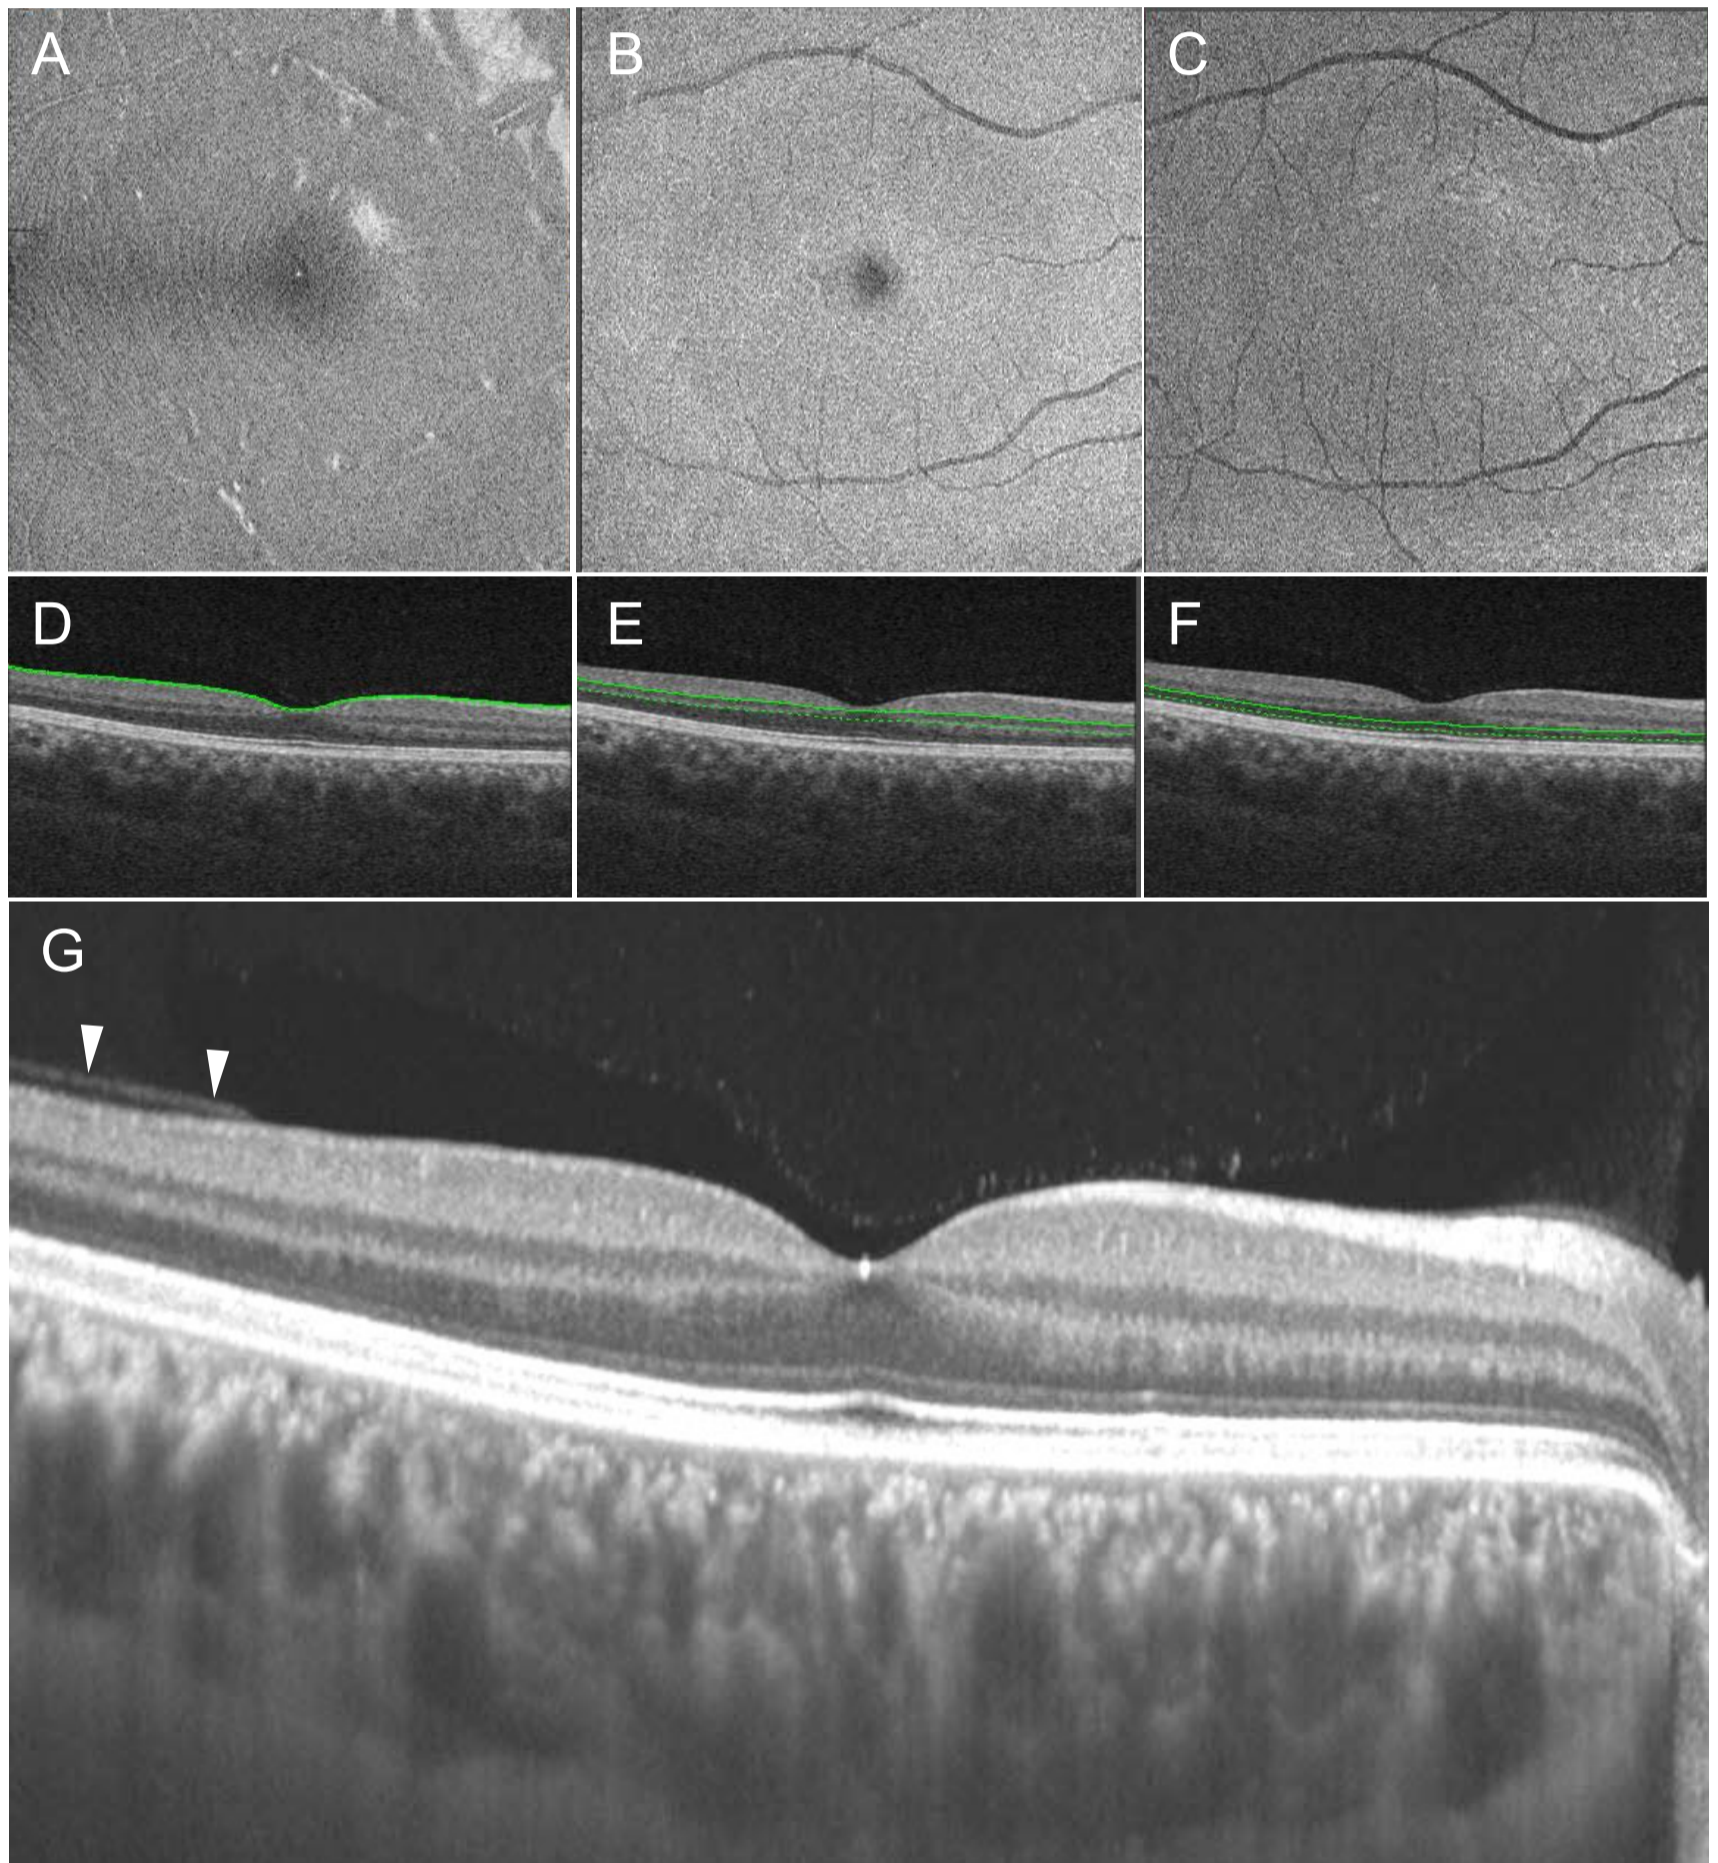

Supplement: 41598_2021_87440_MOESM1_ESM.pdf [file 41598_2021_87440_MOESM1_ESM.pdf]
